# Supplementary material for: MCMICRO: a scalable, modular image-processing pipeline for multiplexed tissue imaging
Source: PubMed Central journal article supplement (PMC8916956; doi:10.1038/s41592-021-01308-y), 2021-11-25
Supplement: 41592_2021_1308_MOESM1_ESM.pdf [file 41592_2021_1308_MOESM1_ESM.pdf]

---

**Supplementary information**

---

**MCMICRO: a scalable, modular image-processing pipeline for multiplexed tissue imaging**

---

In the format provided by the authors and unedited

Figure S1

The EMIT dataset spanning 123 tissue cores across 34 cancer, non-neoplastic diseases, and normal tissue type

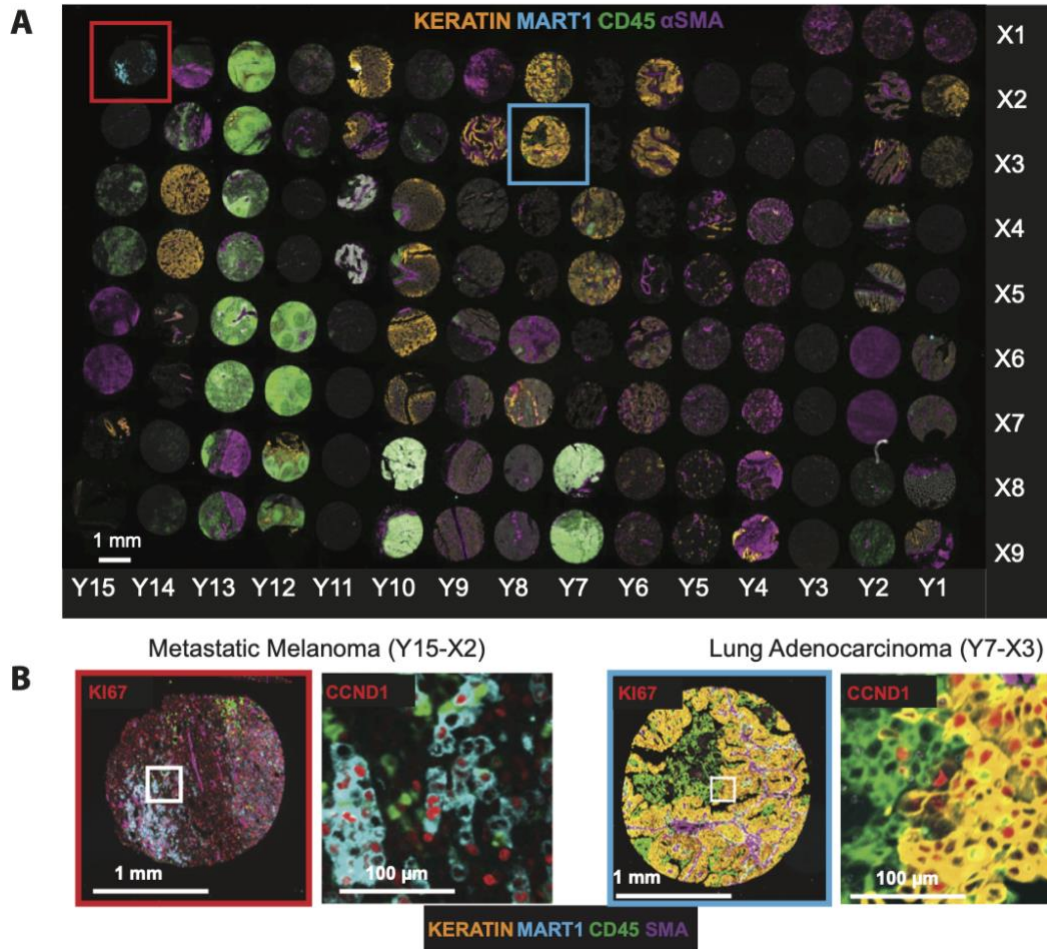

**A.** CyCIF whole slide image of EMIT visualizing Hoechst 33342-stained nuclear DNA (white), Keratin (orange), MART1 (cyan), CD45 (green) and SMA (purple). **B.** A zoom-in view of a metastatic melanoma (left, red box) and a lung adenocarcinoma (right, blue box) core. The highest zoom level is highlighted with white boxes in the corresponding low magnification images. This experiment was performed once.

Figure S2

Principal component analysis (PCA) of Spatial Feature Tables derived from EMIT images

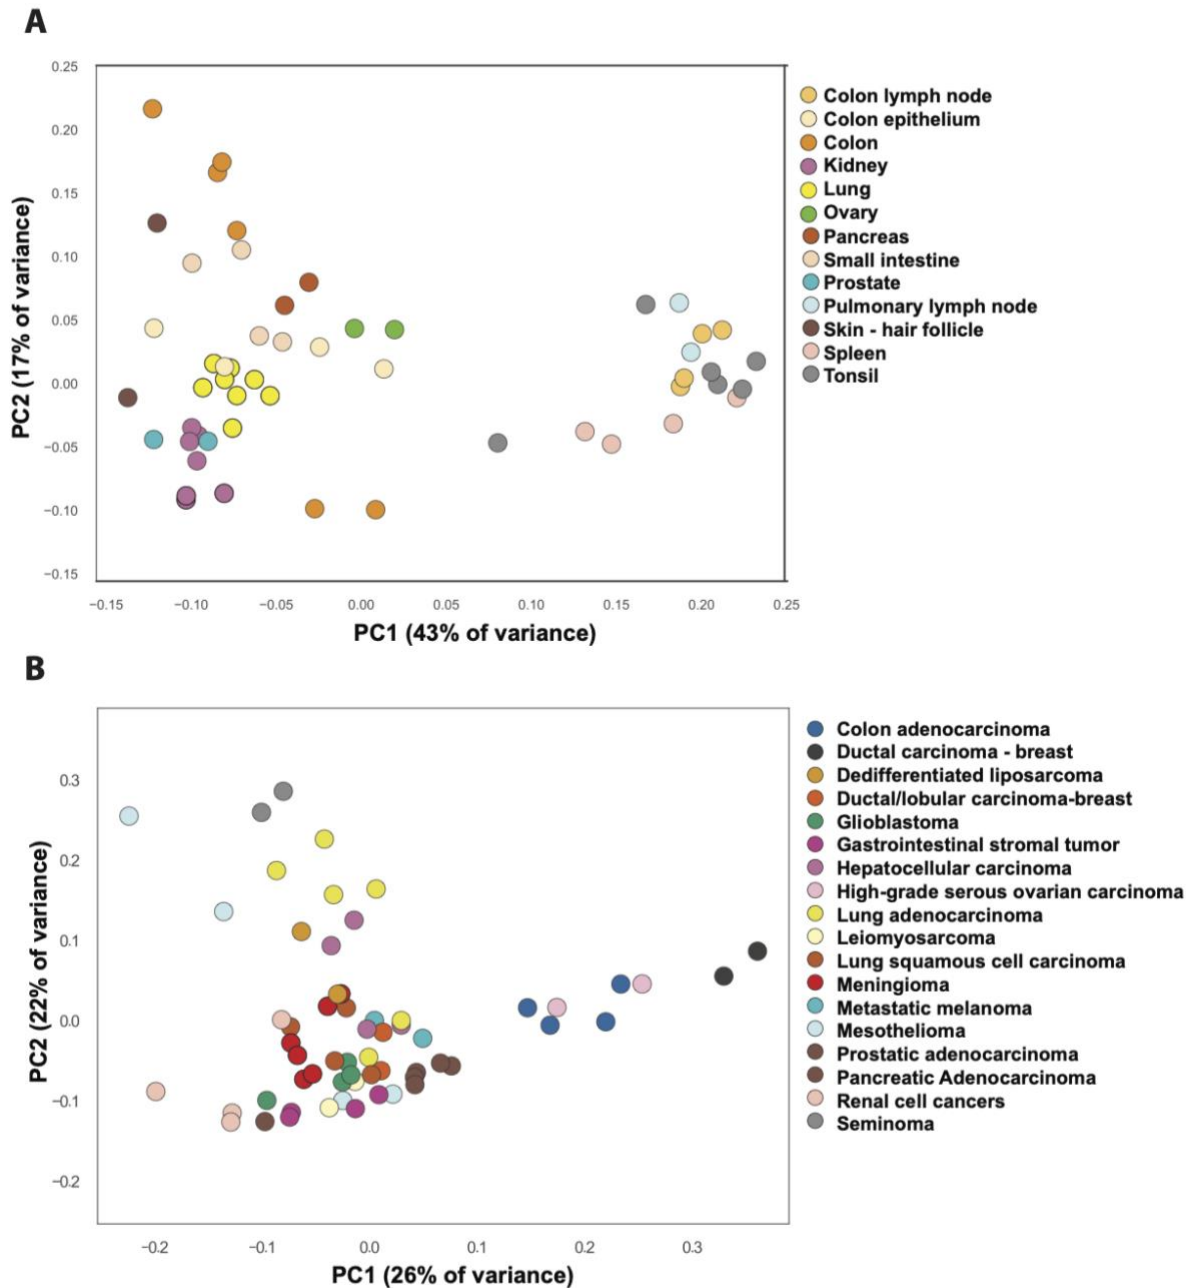

**A.** represents normal tissues and **B.** cancer tissues. Independent cores cluster to a substantial degree by tissue or cancer type; some variation is expected because tumors had different grades and derive from different individuals. Data from the following antibodies was used to generate the data: CD73, MART1, KI67, pan-cytokeratin, CD45, ECAD,  $\alpha$ -SMA, CD32, CDKN1A, CCNA2, CDKN1C, CDKN1B, CCND1, cPARP, CCNB1, PCNA and CDK2.

Figure S3

Nextflow enables reproducible data processing using the provenance module

**A**

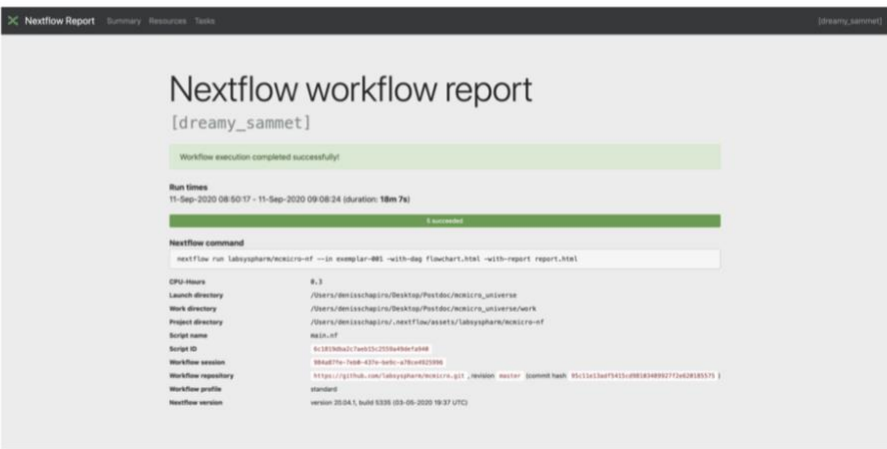

**B**

- probmaps/ilastik (1).log
- probmaps/ilastik (1).sh
- probmaps/unmicst (1).log
- probmaps/unmicst (1).sh
- quantification (1).log
- quantification (1).sh
- quantification (2).log
- quantification (2).sh
- segmentation/s3seg (1).log
- segmentation/s3seg (1).sh
- segmentation/s3seg (2).log
- segmentation/s3seg (2).sh

**C**

```
#!/bin/bash -oe
python /app/CommandSingleCellExtraction.py --image ilastik-exemplar-001.ome.tif --masks cellMask.tif --output . --channel_names markers.csv
```

**D**

```
{'masks': ['celMask.tif'], 'image': 'ilastik-exemplar-001.ome.tif', 'channel_names': 'markers.csv', 'output': '.'}
Extracting single-cell data for ilastik-exemplar-001.ome.tif...
Finished 0
Finished 1
Finished 2
Finished 3
Finished 4
Finished 5
Finished 6
Finished 7
Finished 8
Finished 9
Finished 10
Finished 11
Finished ilastik-exemplar-001
```

**A.** Nextflow report provides detailed documentation for used resources, directories, repositories (including commit hash) and the corresponding execution times. The report is browser based and interactive. **B-D.** Provenance reconstruction enabled by recording each executed command (.sh) and its output (.log). Representative examples of a command and its output are shown in **C** and **D**, respectively.

Figure S4

Detailed insight into the computational resources required by each module, generated by Nextflow

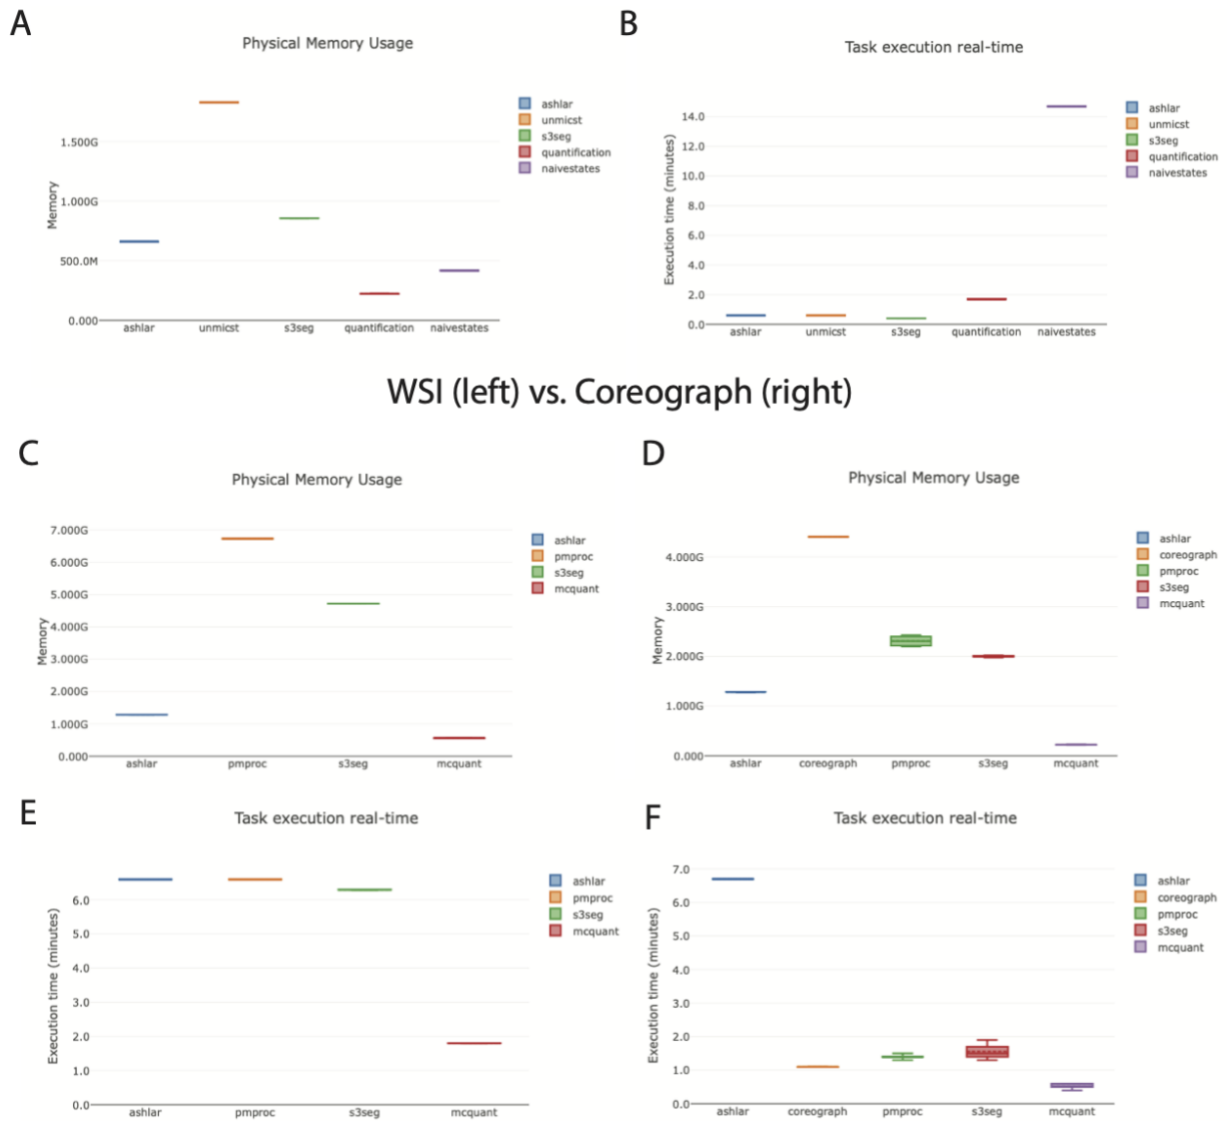

The data is viewed as an interactive browser-based report. **A.** Physical memory usage is recorded as either RAM only (visualized), RAM + Disk swap or % RAM allocated. **B.** Job duration is recorded as either execution time (visualized) or % time allocated. **C-D** compares the physical memory usage and **E-F** the task execution time in minutes between whole slide image TMA downstream processing (left, C and E) and Coreograph segmented TMAs (right, D and F). Panels **A, B, C** and **E** were derived when processing a single whole-slide image ( $n=1$ ), while panels **D** and **F** correspond to processing the EMIT TMA ( $n=123$  images). In all panels, the box shows inter-quartile range (q1 to q3) with a horizontal line denoting the median; the whiskers extend to the minimum and the maximum values.

Figure S5

The web-based Galaxy platform for Multiplexed Tissue Imaging analysis

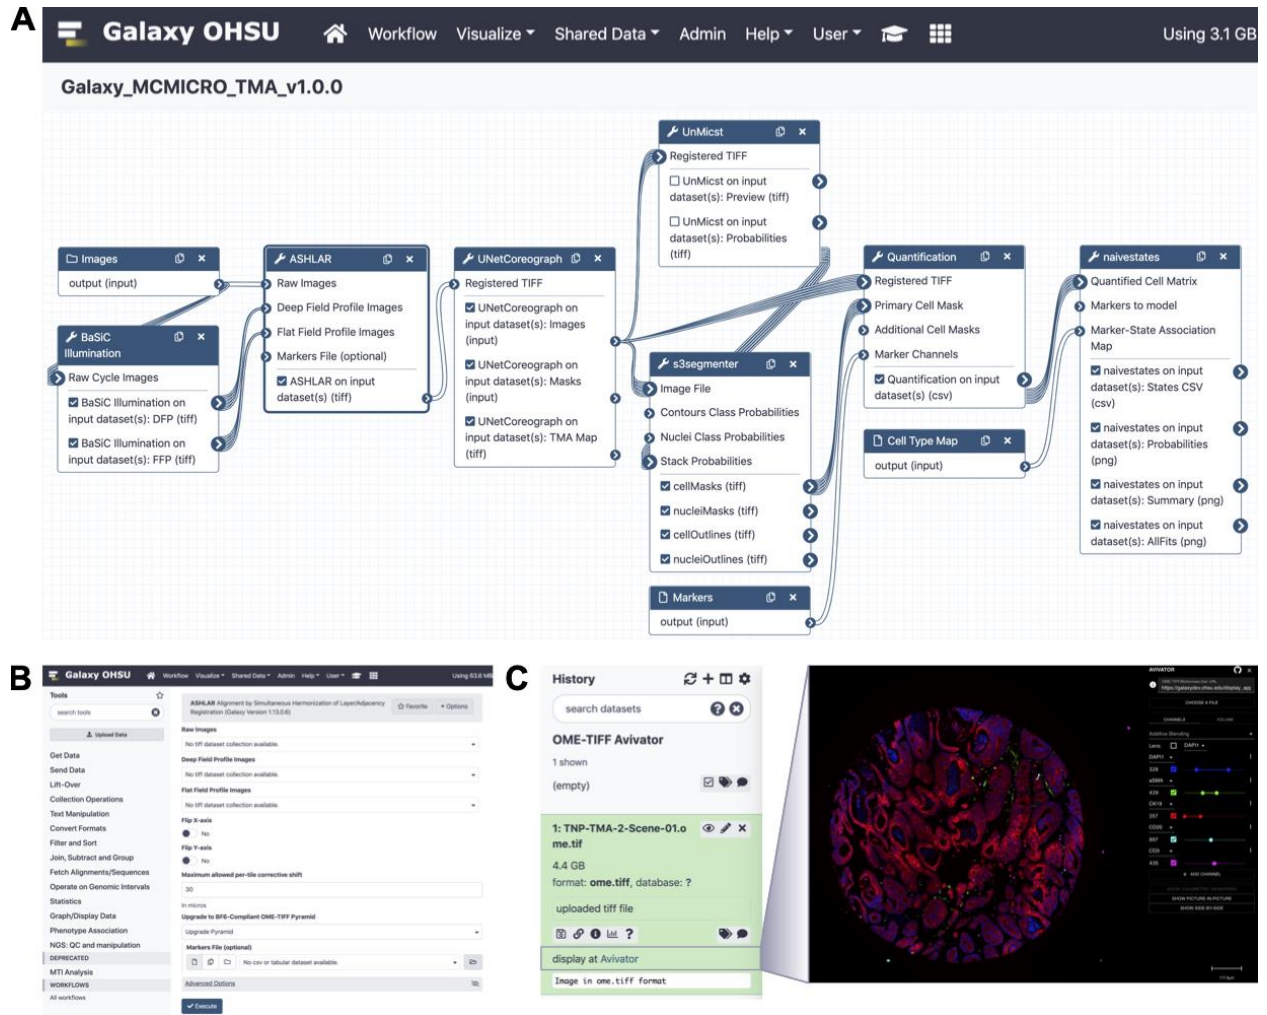

**A.** A detailed representation of the Galaxy interface implemented for MCMICRO. Process of a TMA is shown, including image registration, de-arraying, segmentation, quantification, and cell state phenotyping. A single line denotes one dataset flowing from the output of one tool to the input of the next tool, whereas multiple lines denote a group of datasets flowing from one tool to the next. **B.** Galaxy tool user interface showing the ASHLAR module. With this interface, a user can select tool inputs, set parameter values, and execute the tool all in a web browser. Default parameters are provided that can be changed at run time. **C.** Multi-channel images can be viewed interactively in a web browser from Galaxy using the Aviator visualization. A single core of the TMA with channels corresponding to Hoechst 33342-stained nuclear DNA (blue),  $\alpha$ -smooth muscle actin ( $\alpha$ -SMA; green), cytokeratin (red), B cell marker CD20 (cyan), and the T cell marker CD3 (magenta). With Aviator, users can browse and zoom around images, show and hide channels, and set channel colors and intensity ranges.

**Supplementary Table 1: Highly multiplexed imaging methods**

| Cyclic methods, fluorescence imaging                                                      |                                                                 | Cyclic immuno-histochemistry                                                               | Non-cyclic mass spectrometry based               |
|-------------------------------------------------------------------------------------------|-----------------------------------------------------------------|--------------------------------------------------------------------------------------------|--------------------------------------------------|
| Co-detection by indexing ( <b>CODEX</b> ) <sup>1</sup>                                    | Multiplexed Immunofluorescence ( <b>MxIF</b> ) <sup>2</sup>     | Fluorescent Multiplex Immunohistochemistry ( <b>mIHC</b> ) <sup>3</sup>                    | Imaging Mass Cytometry (IMC) <sup>4</sup>        |
| Immunostaining with signal amplification by exchange reaction (Immuno-SABER) <sup>5</sup> | Cyclic immunofluorescence ( <b>CyCIF</b> ) <sup>6</sup>         | Multiplexed Immunohistochemical Consecutive Staining on Single Slide (MICSSS) <sup>7</sup> | Multiplexed Ion Beam Imaging (MIBI) <sup>8</sup> |
|                                                                                           | Iterative indirect immunofluorescence imaging (4i) <sup>9</sup> |                                                                                            |                                                  |

**Table S1:** Data collected in the course of this study using methods in bold were successfully processed by MCMICRO; results are shown in **Figure 2** and detailed descriptions of intermediate processing results are provided with the documentation available at [mcmicro.org](http://mcmicro.org). Publicly available data for IMC and MIBI were also processed.

**Supplementary Table 2: Available open-source tools for single cell analysis, image processing and visualization**

| Software               | Scalable                                       | Whole slide processing | Stitching and registration | Modular | Segmentation | Analysis | GUI |
|------------------------|------------------------------------------------|------------------------|----------------------------|---------|--------------|----------|-----|
| MCMICRO                | Yes                                            | Yes                    | Yes                        | Yes     | Yes          | Yes      | No  |
| Cytokit <sup>10</sup>  | Yes                                            | No (tiles)             | No                         | No      | Yes          | Yes      | Yes |
| starfish <sup>11</sup> | Yes                                            | No (tiles)             | No                         | Yes     | Yes          | Yes      | No  |
| histoCAT <sup>12</sup> | No                                             | Yes                    | No                         | Yes     | No           | Yes      | Yes |
| QuPath <sup>13</sup>   | No                                             | Yes                    | No                         | No      | Yes          | Yes      | Yes |
| CytoMAP <sup>14</sup>  | No                                             | Yes                    | No                         | No      | No           | Yes      | Yes |
| Facetto <sup>15</sup>  | No                                             | Yes                    | No                         | No      | No           | Yes      | Yes |
| napari <sup>16</sup>   | Visualization tool                             |                        |                            |         |              |          |     |
| OMERO <sup>17</sup>    | Visualization tool                             |                        |                            |         |              |          |     |
| Minerva <sup>18</sup>  | Visualization tool                             |                        |                            |         |              |          |     |
| Seurat <sup>19</sup>   | R toolkit for single cell genomics             |                        |                            |         |              |          |     |
| Scanpy <sup>20</sup>   | Python toolkit for single cell genomics        |                        |                            |         |              |          |     |
| Cumulus <sup>21</sup>  | Cloud-based framework for single cell genomics |                        |                            |         |              |          |     |

**Table S2:** List of open-source tools available for highly multiplexed image processing.



**Supplementary Table 3:** Detailed information about antibodies used to acquire the first EMIT image of a 123-core Tissue Microarray.

| channel_number | cycle_number | marker_name | marker              | Vendor        | Cat. No.        | Dilution | RRID        | QC          |
|----------------|--------------|-------------|---------------------|---------------|-----------------|----------|-------------|-------------|
| 1              | 1            | DNA1        | DNA                 |               |                 |          |             | Pass        |
| 2              | 1            | bg2b        | Rabbit IgG          | Thermo Fisher | A11070          | 2000     | AB_2534114  | NA          |
| 3              | 1            | bg3b        | Goat IgG            | Thermo Fisher | A21432          | 2000     | AB_2535853  | NA          |
| 4              | 1            | bg4b        | Mouse IgG           | Thermo Fisher | A21237          | 2000     | AB_2535806  | NA          |
| 5              | 2            | DNA2        | DNA                 |               |                 |          |             | Pass        |
| 6              | 2            | chREBP      | chREBP              | Abcam         | ab92809         | 100      | AB_10562135 | Exploratory |
| 7              | 2            | CMA1        | Mast Cell Chymase   | Abcam         | ab111239        | 100      | AB_10863662 | Pass        |
| 8              | 2            | MBP         | Major Basic Protein | BioRad        | MCA5751         | 50       | AB_10671914 | Exploratory |
| 9              | 3            | DNA3        | DNA                 |               |                 |          |             | Pass        |
| 10             | 3            | ECAD        | E-Cadherin          | CST           | 31995           | 300      | AB_10691457 | Pass        |
| 11             | 3            | panCK       | pan-Cytokeratin     | Thermo-Fisher | 41-9003-82      | 1000     | AB_11218704 | Pass        |
| 12             | 3            | CD45        | CD45                | BioLegend     | 304056          | 300      | AB_2564155  | Pass        |
| 13             | 4            | DNA4        | DNA                 |               |                 |          |             | Pass        |
| 14             | 4            | CD4         | CD4                 | R&D Systems   | FAB8165G        | 200      | AB_2728839  | Pass        |
| 15             | 4            | CD3D        | CD3d                | abcam         | ab208514        | 150      | AB_2728789  | Pass        |
| 16             | 4            | CD8A        | CD8a                | invitrogen    | 50-0008-82      | 300      | AB_2574149  | Pass        |
| 17             | 5            | DNA5        | DNA                 |               |                 |          |             | Pass        |
| 18             | 5            | pJUN        | p-cJun              | CST           | 127145          | 100      | AB_2798004  | Exploratory |
| 19             | 5            | cCASP3      | Cleaved Caspase 3   | CST           | 9978S           | 200      | AB_10831820 | Fail        |
| 20             | 5            | IRF3_1      | IRF3                | SC            | sc-33641 AF647  | 200      | AB_2890146  | Exploratory |
| 21             | 6            | DNA6        | DNA                 |               |                 |          |             | Pass        |
| 22             | 6            | NUP133      | NUP133              | SC            | sc-376763 AF488 | 100      | AB_2889360  | Pass        |
| 23             | 6            | CALP        | Calponin            | Abcam         | ab208051        | 200      | AB_2890147  | Exploratory |
| 24             | 6            | NUP98       | NUP98               | CST           | 13393S          | 200      | AB_2728831  | Pass        |
| 25             | 7            | DNA7        | DNA                 |               |                 |          |             | Pass        |
| 26             | 7            | LMNB1       | LMNB1               | abcam         | ab194106        | 200      | AB_2728786  | Pass        |
| 27             | 7            | IRF3_2      | IRF3                | CST           | 73147S          | 150      | AB_2799834  | Exploratory |
| 28             | 7            | CD45R       | CD45R               | BioLegend     | 103226          | 200      | AB_389330   | Fail        |
| 29             | 8            | DNA8        | DNA                 |               |                 |          |             | Pass        |
| 30             | 8            | IRF3_3      | IRF3                | abcam         | ab204647        | 150      | AB_2890152  | Exploratory |
| 31             | 8            | PML         | PML                 | abcam         | ab217524        | 300      | AB_2890149  | Pass        |
| 32             | 8            | GLUT1       | GLUT1               | abcam         | ab195020        | 300      | AB_2783877  | Pass        |
| 33             | 9            | DNA9        | DNA                 |               |                 |          |             | Pass        |
| 34             | 9            | LMNAC       | LaminAC             | CST           | 8617S           | 100      | AB_10997529 | Pass        |
| 35             | 9            | CD1B        | CD1B                | Biolegend     | 329108          | 100      | AB_10613102 | Fail        |
| 36             | 9            | Hsp27       | Hsp27               | abcam         | ab194078        | 1000     | AB_2889283  | Pass        |
| 37             | 10           | DNA10       | DNA                 |               |                 |          |             | Pass        |
| 38             | 10           | GAPDH       | GAPDH               | abcam         | ab204276        | 500      | AB_2889198  | Pass        |
| 39             | 10           | HSP90       | HSP90               | CST           | 70657S          | 300      | AB_2799788  | Exploratory |
| 40             | 10           | S100A11     | S100A11             | abcam         | ab207545        | 300      | AB_2889311  | Pass        |
| 41             | 11           | DNA11       | DNA                 |               |                 |          |             | Pass        |
| 42             | 11           | TDP43       | TDP43               | abcam         | ab193842        | 200      | AB_2889241  | Pass        |
| 43             | 11           | OGT         | OGT                 | abcam         | ab215809        | 300      | AB_2889304  | Pass        |
| 44             | 11           | COLL4       | Collagen IV         | eBioscience   | 51-9871-80      | 500      | AB_10854267 | Pass        |
| 45             | 12           | DNA12       | DNA                 |               |                 |          |             | Pass        |
| 46             | 12           | FCERG1A     | FCERG1A             | SC            | sc-517280 AF488 | 100      | AB_2889358  | Fail        |
| 47             | 12           | SQSTM1      | SQSTM1              | Abcam         | ab203430        | 100      | AB_2728795  | Fail        |
| 48             | 12           | LMNB2       | LMNB2               | Abcam         | ab200427        | 200      | AB_2889288  | Pass        |
| 49             | 13           | DNA13       | DNA                 |               |                 |          |             | Pass        |
| 50             | 13           | HSP70       | Hsp70               | abcam         | ab61907         | 200      | AB_2120890  | Fail        |
| 51             | 13           | KI67        | KI67                | Thermo-Fisher | 41-5698-82      | 300      | AB_11220285 | Fail        |
| 52             | 13           | pH2AX       | pH2AX               | BioLegend     | 613407          | 200      | AB_2114994  | Pass        |
| 53             | 14           | DNA14       | DNA                 |               |                 |          |             | Pass        |
| 54             | 14           | SEC61A      | SEC61A              | abcam         | ab205794        | 100      | AB_2890150  | Pass        |
| 55             | 14           | EPCAM       | EpCAM               | BioLegend     | 324205          | 200      | AB_756079   | Pass        |
| 56             | 14           | CD86        | CD86                | eBioscience   | 62-0869-41      | 100      | AB_2637394  | Fail        |
| 57             | 15           | DNA15       | DNA                 |               |                 |          |             | Pass        |
| 58             | 15           | LMNAC_2     | Lamin A/C           | Abcam         | ab185014        | 100      | AB_2889225  | Pass        |
| 59             | 15           | ECAD        | E-Cadherin          | abcam         | ab206878        | 300      | AB_2801591  | Pass        |
| 60             | 15           | KI67        | KI67                | BioLegend     | 350509          | 200      | AB_10900821 | Fail        |
| 61             | 16           | DNA16       | DNA                 |               |                 |          |             | Pass        |
| 62             | 16           | LBR         | Lamin B Receptor    | Abcam         | ab201532        | 100      | AB_2889290  | Pass        |
| 63             | 16           | VEGFR2      | VEGFR2              | CST           | 12634S          | 150      | AB_2728829  | Pass        |
| 64             | 16           | TUBG        | Gamma tubulin       | Abcam         | ab191114        | 100      | AB_2889219  | Pass        |

**Supplementary Table 4:** Detailed information about antibodies used to acquire the second EMIT image of a 123-core Tissue Microarray.

| channel_number | cycle_number | marker_name | marker     | Vendor                    | Catalog Number | Dilution | RRID        | QC          |
|----------------|--------------|-------------|------------|---------------------------|----------------|----------|-------------|-------------|
| 1              | 1            | DNA1        | DNA        | NA                        | NA             | NA       | NA          | Pass        |
| 2              | 1            | Rabbit IgG  | Rabbit IgG | Thermo Fisher             | A11070         | 2000     | AB_2534114  | NA          |
| 3              | 1            | Goat IgG    | Goat IgG   | Thermo Fisher             | A21432         | 2000     | AB_2535853  | NA          |
| 4              | 1            | Mouse IgG   | Mouse IgG  | Thermo Fisher             | A21237         | 2000     | AB_2535806  | NA          |
| 5              | 2            | DNA2        | DNA        | NA                        | NA             | NA       | NA          | Pass        |
| 6              | 2            | CD73        | CD73       | CST                       | 13160S         | 200      | AB_2716625  | Pass        |
| 7              | 2            | CD107B      | CD107B     | R&D Systems               | AF6228         | 500      | AB_10971818 | Exploratory |
| 8              | 2            | MART1       | MART1      | BioLegend                 | 917901         | 300      | AB_2565202  | Pass        |
| 9              | 3            | DNA3        | DNA        | NA                        | NA             | NA       | NA          | Pass        |
| 10             | 3            | KI67        | KI67       | CST                       | 11882S         | 200      | AB_2687824  | Pass        |
| 11             | 3            | pan-CK      | pan-CK     | Thermo-Fisher             | 41-9003-82     | 1000     | AB_11218704 | Pass        |
| 12             | 3            | CD45        | CD45       | BioLegend                 | 304056         | 300      | AB_2564155  | Pass        |
| 13             | 4            | DNA4        | DNA        | NA                        | NA             | NA       | NA          | Pass        |
| 14             | 4            | ECAD        | ECAD       | Cell Signaling Technology | 3199S          | 300      | AB_10691457 | Pass        |
| 15             | 4            | aSMA        | aSMA       | abcam                     | ab202509       | 1000     | AB_2868435  | Pass        |
| 16             | 4            | CD56        | CD56       | SC                        | sc-7326 AF647  | 100      | AB_2890151  | Fail        |
| 17             | 5            | DNA5        | DNA        | NA                        | NA             | NA       | NA          | Pass        |
| 18             | 5            | CD13        | CD13       | Abcam                     | ab239271       | 150      | AB_2889257  | Fail        |
| 19             | 5            | CD63        | CD63       | Abcam                     | ab215431       | 150      | AB_2889263  | Exploratory |
| 20             | 5            | CD32        | CD32       | Abcam                     | ab209451       | 150      | AB_2889260  | Exploratory |
| 21             | 6            | DNA6        | DNA        | NA                        | NA             | NA       | NA          | Pass        |
| 22             | 6            | CDKN1A      | CDKN1A     | CST                       | 5487S          | 200      | AB_10699024 | Pass        |
| 23             | 6            | CCNA2       | CCNA2      | Abcam                     | ab217731       | 300      | AB_2884890  | Pass        |
| 24             | 6            | CDKN1C      | CDKN1C     | Abcam                     | ab199253       | 200      | AB_2889305  | Pass        |
| 25             | 7            | DNA7        | DNA        | NA                        | NA             | NA       | NA          | Pass        |
| 26             | 7            | PCNA_1      | PCNA       | BioLegend                 | 307909         | 500      | AB_2160546  | Pass        |
| 27             | 7            | pAUR        | pAUR       | CST                       | 13464S         | 300      | AB_2728824  | Fail        |
| 28             | 7            | CDKN1B_1    | CDKN1B     | Abcam                     | ab194234       | 300      | AB_2728802  | Pass        |
| 29             | 8            | DNA8        | DNA        | NA                        | NA             | NA       | NA          | Pass        |
| 30             | 8            | CCND1       | CCND1      | Abcam                     | AB190194       | 200      | AB_2728784  | Pass        |
| 31             | 8            | cPARP       | cPARP      | CST                       | 6894S          | 100      | AB_10830735 | Pass        |
| 32             | 8            | CDKN1B_2    | CDKN1B     | Abcam                     | ab194234       | 300      | AB_2728802  | Pass        |
| 33             | 9            | DNA9        | DNA        | NA                        | NA             | NA       | NA          | Pass        |
| 34             | 9            | pCREB       | pCREB      | CST                       | 9187S          | 150      | AB_659957   | Pass        |
| 35             | 9            | CCNB1       | CCNB1      | Abcam                     | ab214381       | 300      | AB_2884889  | Pass        |
| 36             | 9            | CCNE        | CCNE       | TF                        | 50-9714-80     | 200      | AB_2574350  | Fail        |
| 37             | 10           | DNA10       | DNA        | NA                        | NA             | NA       | NA          | Pass        |
| 38             | 10           | PCNA_2      | PCNA       | CST                       | 8580S          | 1000     | AB_11178664 | Pass        |
| 39             | 10           | CDK2        | CDK2       | Abcam                     | ab208043       | 300      | AB_2889266  | Pass        |
| 40             | 10           | CDKN2A      | CDKN2A     | Abcam                     | ab192054       | 500      | AB_2889194  | Fail        |

### Supplementary table references:

1. Goltsev, Y., Samusik, N., Kennedy-Darling, J., Bhate, S., Hale, M., Vazquez, G., Black, S. & Nolan, G. P. Deep Profiling of Mouse Splenic Architecture with CODEX Multiplexed Imaging. *Cell* **174**, 968-981.e15 (2018).
2. Gerdes, M. J., Sevinsky, C. J., Sood, A., Adak, S., Bello, M. O., Bordwell, A., Can, A., Corwin, A., Dinn, S., Filkins, R. J., Hollman, D., Kamath, V., Kaanumalle, S., Kenny, K., Larsen, M., Lazare, M., Li, Q., Lowes, C., McCulloch, C. C., McDonough, E., Montalto, M. C., Pang, Z., Rittscher, J., Santamaria-Pang, A., Sarachan, B. D., Seel, M. L., Seppo, A., Shaikh, K., Sui, Y., Zhang, J. & Ginty, F. Highly multiplexed single-cell analysis of formalin-fixed, paraffin-embedded cancer tissue. *PNAS* **110**, 11982–11987 (2013).
3. Tsujikawa, T., Kumar, S., Borkar, R. N., Azimi, V., Thibault, G., Chang, Y. H., Balter, A., Kawashima, R., Choe, G., Sauer, D., El Rassi, E., Clayburgh, D. R., Kulesz-Martin, M. F., Lutz, E. R., Zheng, L., Jaffee, E. M., Leyshock, P., Margolin, A. A., Mori, M., Gray, J. W., Flint, P. W. & Coussens, L. M. Quantitative Multiplex Immunohistochemistry Reveals Myeloid-Inflamed Tumor-Immune Complexity Associated with Poor Prognosis. *Cell Reports* **19**, 203–217 (2017).
4. Giesen, C., Wang, H. A. O., Schapiro, D., Zivanovic, N., Jacobs, A., Hattendorf, B., Schüffler, P. J., Grolimund, D., Buhmann, J. M., Brandt, S., Varga, Z., Wild, P. J., Günther, D. & Bodenmiller, B. Highly multiplexed imaging of tumor tissues with subcellular resolution by mass cytometry. *Nat Methods* **11**, 417–422 (2014).
5. Saka, S. K., Wang, Y., Kishi, J. Y., Zhu, A., Zeng, Y., Xie, W., Kirli, K., Yapp, C., Cicconet, M., Beliveau, B. J., Lapan, S. W., Yin, S., Lin, M., Boyden, E. S., Kaeser, P. S., Pihan, G., Church, G. M. & Yin, P. Immuno-SABER enables highly multiplexed and amplified protein imaging in tissues. *Nat Biotechnol* **37**, 1080–1090 (2019).
6. Lin, J.-R., Izar, B., Wang, S., Yapp, C., Mei, S., Shah, P. M., Santagata, S. & Sorger, P. K. Highly multiplexed immunofluorescence imaging of human tissues and tumors using t-CyCIF and conventional optical microscopes. *eLife* **7**, e31657 (2018).
7. Remark, R., Merghoub, T., Grabe, N., Litjens, G., Damotte, D., Wolchok, J. D., Merad, M. & Gnjatic, S. In-depth tissue profiling using multiplexed immunohistochemical consecutive staining on single slide. *Science Immunology* **1**, aaf6925–aaf6925 (2016).
8. Angelo, M., Bendall, S. C., Finck, R., Hale, M. B., Hitzman, C., Borowsky, A. D., Levenson, R. M., Lowe, J. B., Liu, S. D., Zhao, S., Natkunam, Y. & Nolan, G. P. Multiplexed ion beam imaging (MIBI) of human breast tumors. *Nat Med* **20**, 436–442 (2014).
9. Gut, G., Herrmann, M. D. & Pelkmans, L. Multiplexed protein maps link subcellular organization to cellular states. *Science* **361**, eaar7042 (2018).

10. Czech, E., Aksoy, B. A., Aksoy, P. & Hammerbacher, J. Cytokit: a single-cell analysis toolkit for high dimensional fluorescent microscopy imaging. *BMC Bioinformatics* **20**, 448 (2019).
11. <https://spacex-starfish.readthedocs.io/en/latest/>.
12. Schapiro, D., Jackson, H. W., Raghuraman, S., Fischer, J. R., Zanutelli, V. R. T., Schulz, D., Giesen, C., Catena, R., Varga, Z. & Bodenmiller, B. histoCAT: analysis of cell phenotypes and interactions in multiplex image cytometry data. *Nat Methods* **14**, 873–876 (2017).
13. Bankhead, P., Loughrey, M. B., Fernández, J. A., Dombrowski, Y., McArt, D. G., Dunne, P. D., McQuaid, S., Gray, R. T., Murray, L. J., Coleman, H. G., James, J. A., Salto-Tellez, M. & Hamilton, P. W. QuPath: Open source software for digital pathology image analysis. *Sci Rep* **7**, 16878 (2017).
14. Stoltzfus, C. R., Filipek, J., Gern, B. H., Olin, B. E., Leal, J. M., Wu, Y., Lyons-Cohen, M. R., Huang, J. Y., Paz-Stoltzfus, C. L., Plumlee, C. R., Pöschinger, T., Urdahl, K. B., Perro, M. & Gerner, M. Y. CytoMAP: A Spatial Analysis Toolbox Reveals Features of Myeloid Cell Organization in Lymphoid Tissues. *Cell Reports* **31**, 107523 (2020).
15. Krueger, R., Beyer, J., Jang, W.-D., Kim, N. W., Sokolov, A., Sorger, P. K. & Pfister, H. Facetto: Combining Unsupervised and Supervised Learning for Hierarchical Phenotype Analysis in Multi-Channel Image Data. *IEEE Trans. Visual. Comput. Graphics* **26**, 227–237 (2020).
16. Sofroniew, N., Talley Lambert, Evans, K., Nunez-Iglesias, J., Yamauchi, K., Solak, A. C., Buckley, G., Bokota, G., Tung, T., Ziyangczi, Freeman, J., Boone, P., Winston, P., Loic Royer, Har-Gil, H., Axelrod, S., Rokem, A., Bryant, Hector, Mars Huang, Pranathi Vemuri, Dunham, R., Jakirkham, Siqueira, A. D., Bhavya Chopra, Wood, C., Gohlke, C., Bennett, D., DragaDoncila & Perlman, E. *napari/napari: 0.3.5*. (Zenodo, 2020). doi:10.5281/ZENODO.3555620
17. Allan, C., Burel, J.-M., Moore, J., Blackburn, C., Linkert, M., Loynton, S., Macdonald, D., Moore, W. J., Neves, C., Patterson, A., Porter, M., Tarkowska, A., Loranger, B., Avondo, J., Lagerstedt, I., Lianas, L., Leo, S., Hands, K., Hay, R. T., Patwardhan, A., Best, C., Kleywegt, G. J., Zanetti, G. & Swedlow, J. R. OMERO: flexible, model-driven data management for experimental biology. *Nat Methods* **9**, 245–253 (2012).
18. Rashid, R., Chen, Y.-A., Hoffer, J., Muhlich, J. L., Lin, J.-R., Krueger, R., Pfister, H., Mitchell, R., Santagata, S. & Sorger, P. K. *Online narrative guides for illuminating tissue atlas data and digital pathology images*. (Scientific Communication and Education, 2020). doi:10.1101/2020.03.27.001834
19. Satija, R., Farrell, J. A., Gennert, D., Schier, A. F. & Regev, A. Spatial reconstruction of single-cell gene expression data. *Nat Biotechnol* **33**, 495–502 (2015).

20. Wolf, F. A., Angerer, P. & Theis, F. J. SCANPY: large-scale single-cell gene expression data analysis. *Genome Biology* **19**, (2018).
21. Li, B., Gould, J., Yang, Y., Sarkizova, S., Tabaka, M., Ashenberg, O., Rosen, Y., Slyper, M., Kowalczyk, M. S., Villani, A.-C., Tickle, T., Hacohen, N., Rozenblatt-Rosen, O. & Regev, A. Cumulus provides cloud-based data analysis for large-scale single-cell and single-nucleus RNA-seq. *Nat Methods* **17**, 793–798 (2020).
